# Supplementary material for: Knockdown of lncRNA ZNRD1-AS1 suppresses gastric cancer cell proliferation and metastasis by targeting the miR-9-5p/HSP90AA1 axis
Source: publisher site journal article supplement (doi:10.18632/aging.203209), 2021-07-02
Supplement: Supplementary file [file aging-v13i13-203209-supplementary-material-SD1.pdf]

**SUPPLEMENTARY FIGURES**

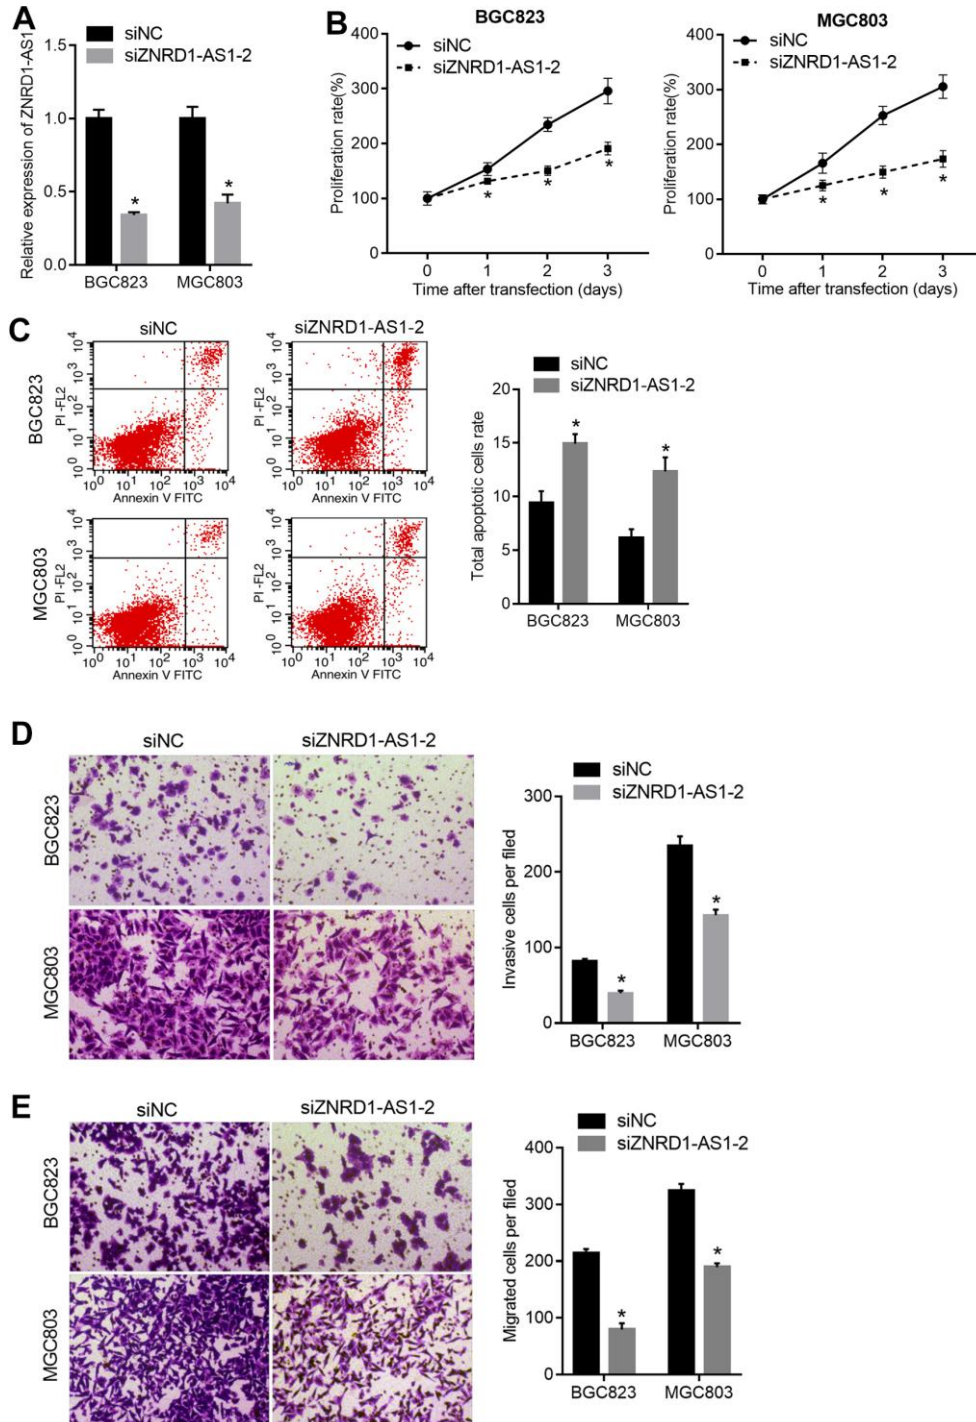

**Supplementary Figure 1. Transfection of siZNRD1-AS1-2 suppresses malignant properties and promotes apoptosis in MGC803 and BGC823 cells.** siRNA-2 targeting ZNRD1-AS1 (siZNRD1-AS1-2) or negative control siRNA (siNC) was transfected into cells. ZNRD1-AS1 mRNA expression levels were measured using qRT-PCR (A). Cell proliferation (B) and apoptosis (C) were analyzed by CCK8 assay and flow cytometry, respectively. Cell invasion (D) and migration (E) were analyzed by Transwell assays. Left panels show representative micrographs. Right panels show statistical results. \*p < 0.05, for siZNRD1-AS1-2 vs. siNC.

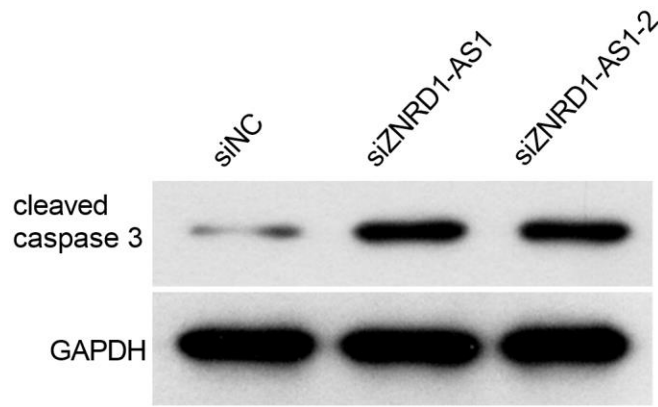

**Supplementary Figure 2. Effect of ZNRD1-AS1 knockdown on cleaved caspase 3 levels in MGC803 cells.** Two siRNAs targeting ZNRD1-AS1 (named as siZNRD1-AS1 or siZNRD1-AS1-2) or negative control siRNA (siNC) were transfected into MGC803; cleaved caspase 3 levels were measured by western blot.
